# Supplementary material
Source: Springer Nature journal article supplement (https://www.springermedizin.de/resource/supplementary/12913_2010_1444_MOESM2_ESM.pdf/9528140)

**Participants**

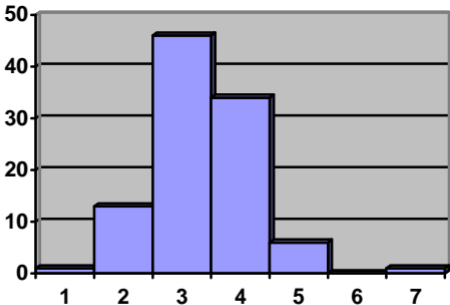

**Recommendations**

Supplement: MOESM2 [file 9528140]
